# 1                   **ENDOSOMAL MEMBRANE TENSION REGULATES ESCRT-III-** 2                   **DEPENDENT INTRA-LUMENAL VESICLE FORMATION**

3                   **Vincent Mercier<sup>1</sup>, Jorge Larios<sup>1,2</sup>, Guillaume Molinard<sup>1</sup>, Antoine Goujon<sup>3</sup>, Stefan Matile<sup>2,3</sup>,**  
4                   **Jean Gruenberg<sup>1,2,\*</sup>, Aurélien Roux<sup>1,2,\*</sup>**

5                   <sup>1</sup>Department of Biochemistry, University of Geneva, CH-1211 Geneva, Switzerland.

6                   <sup>2</sup>National Center of Competence in Research Chemical Biology, University of Geneva, CH-1211 Geneva,  
7                   Switzerland.

8                   <sup>3</sup>Department of Organic Chemistry, University of Geneva, CH-1211 Geneva, Switzerland.

9  
10                   \*co-corresponding and co-last authors

## 11 12 13                   **ABSTRACT**

14                   Plasma membrane tension strongly affects cell surface processes, such as migration, endocytosis  
15                   and signalling. However, it is not known whether membrane tension of organelles regulates their  
16                   functions, notably intracellular traffic. The ESCRT-III complex is the major membrane  
17                   remodelling complex that drives Intra-Luminal Vesicle (ILV) formation on endosomal  
18                   membranes. Here, we made use of a new fluorescent membrane tension probe to show that  
19                   ESCRT-III subunits are recruited onto endosomal membranes when membrane tension is  
20                   reduced. We find that tension-dependent recruitment is associated with ESCRT-III  
21                   polymerization and membrane deformation in vitro, and correlates with increased ILVs  
22                   formation in ESCRT-III decorated endosomes in vivo. Finally, we find that endosomal  
23                   membrane tension decreases when ILV formation is triggered by EGF under physiological  
24                   conditions. These results indicate that membrane tension is a major regulator of ILV formation  
25                   and of endosome trafficking, leading us to conclude that membrane tension can control organelle  
26                   functions.

27  
28  
29                   **One Sentence Summary:** Membrane tension decrease facilitates membrane remodeling by  
30                   ESCRT-III polymerization during intra-luminal vesicle formation.

32 Basic cellular functions are controlled by plasma membrane tension <sup>1</sup>. We wondered whether  
33 membrane tension could also regulate the remodelling of endosomal membranes. The ESCRT-III  
34 complex functions as a general membrane deformation and fission machinery in an orientation  
35 opposite to endocytosis, away from the cytoplasm. It plays essential roles in cytokinetic  
36 abscission, viral budding, nuclear envelope reformation <sup>2-5</sup>, as well as plasma membrane <sup>6</sup> and  
37 lysosome membrane repair <sup>7</sup>. As it drives ILV formation in endosomes <sup>7</sup>, we wondered whether  
38 ESCRT-III function could be controlled by endosomal membrane tension.

39  
40 When cells are bathed in a hypertonic solution, the cytoplasmic volume is reduced through water  
41 expulsion, which results in a decrease of plasma membrane tension <sup>8</sup>. We reasoned that, after  
42 hypertonic shock, the endosome volume and in turn membrane tension should also be reduced  
43 (see outline Fig S1a). We thus decided to determine whether hypertonic conditions affected  
44 ESCRT-III membrane association, and, if so, whether the process depended on membrane  
45 tension. To test this, we used HeLa-Kyoto cells stably expressing the ESCRT-III subunit  
46 CHMP4B-GFP at low, near-endogenous levels. In these cells, CHMP4B-GFP showed mostly a  
47 diffuse, nuclear and cytosolic pattern, with few dots presumably corresponding to endosomes  
48 (Fig 1a). This distribution changed dramatically after hyperosmotic shock (+0.5M sucrose, final  
49 osmolarity ~830mOsm): CHMP4B-GFP relocalized to cytoplasmic punctae (Fig 1a, Movie S1),  
50 as did endogenous CHMP4B in HeLa MZ cells (Fig S1f). The redistribution was both rapid (Fig  
51 1b-c) and transient (Fig 1d): CHMP4B punctae appeared within minutes after hypertonic shock  
52 (Fig 1a-b,d,f), with a maximum at  $\approx 20$  min (Fig 1d), and then disappeared with slower kinetics  
53 (Fig 1d-e, Movie S2). The number of CHMP4B punctae increased with increasing osmolarity  
54 above the physiological level (Fig S1g). By contrast, neither hypotonic nor isotonic medium  
55 addition triggered CHMP4B relocalization (Fig 1b and Fig S1d). Relocalization was not  
56 dependent on the chemical nature of the osmolyte, as it could be recapitulated with the addition  
57 of 250mM NaCl to a final osmolarity ~830mOsm (Fig S1c). Furthermore, the disappearance of  
58 CHMP4B punctae could be accelerated by replacing the hypertonic medium with isotonic  
59 medium (Fig S1k) or even more so with hypotonic medium (Fig 1f-g).  
60 These punctae were not CHMP4B aggregates, as after photobleaching CHMP4B fluorescence  
61 recovered to  $\approx 80\%$  of the initial value with a  $t_{1/2} \approx 1$  min (Fig 1h-i), showing that subunits were  
62 readily exchanged with cytosolic CHMP4B. Moreover, this fast turnover was inhibited by

63 overexpression of the dominant negative mutant K173Q of the triple A ATPase VPS4 (Figure  
64 S1e). Because Vps4-dependent high-turnover of ESCRT-III subunits is associated with  
65 functionality of the ESCRT-III assemblies<sup>9</sup>, our results support the view that CHMP4B punctae  
66 observed after hypertonic shock are functional assemblies of ESCRT-III. We conclude that  
67 hypertonic conditions stimulated the rapid and transient recruitment of ESCRT-III onto  
68 cytoplasmic structures.

69 We next wondered whether these structures were endosomes. Indeed, CHMP4B after hypertonic  
70 shock colocalized with the early endosomal marker EEA1 (Figure 1j), and to a lesser extent with  
71 the late endosomal markers LAMP1 and lysobisphosphatidic acid (LBPA) (Fig 1j). Similarly,  
72 CHMP4B colocalized with internalized transferrin (Fig S1i-j) or EGF (Fig S1h) labelling early  
73 endosomes — but to a lesser extent with chased EGF labelling late endosomes (Fig S1h).  
74 Consistently, subcellular fractionation showed that CHMP4B was increased in endosomal  
75 membrane fractions after hypertonic shock (Fig S1b). Finally, immunogold-labelling of cryo-  
76 sections showed that, after hypertonic shock, the limiting membrane of endosomes containing  
77 BSA-gold endocytosed for 15min was decorated with CHMP4B antibody (Fig 2k, FigS2a).  
78 Among other ESCRT-III subunits, CHMP1B and VPS4 showed an enhanced punctate  
79 distribution, but not CHMP3 (Fig 1l-m; Fig S2b, Fig S3a). Altogether, these observations show  
80 that most ESCRT-III subunits were recruited onto endosomes after hypertonic shock.

81 The major components of ESCRT-0 and ESCRT-I, STAM and TSG101 respectively, were not  
82 recruited suggesting that those complexes remained unaffected upon hypertonic shock (Fig 1m,  
83 Fig S2b, Fig S3a). As ESCRT-0, -I and -II promote ESCRT-III nucleation, we wondered if the  
84 ESCRT-III relocalization depended on its known nucleators, ESCRTs and ALIX. ALIX was  
85 efficiently recruited onto endosomes after hypertonic shock (Figure 1lm, Fig S2b, Fig S3a).  
86 Remarkably, ALIX depletion with siRNAs partially inhibited CHMP4B membrane recruitment  
87 (Fig 1n-o; Fig S4), showing that the process depends on ALIX at least in part. While TSG101  
88 depletion only slightly reduced CHMP4B recruitment, the double ALIX-TSG101 knock-down  
89 most efficiently inhibited CHMP4B membrane recruitment (Fig 1o; Fig S4), consistent with the  
90 view that ALIX and TSG101 function in parallel pathways<sup>10</sup>. Altogether, these data indicate that  
91 hypertonic conditions cause the selective recruitment of ESCRT-III subunits onto endosomal  
92 membranes through its nucleators.

93

**Figure 1**

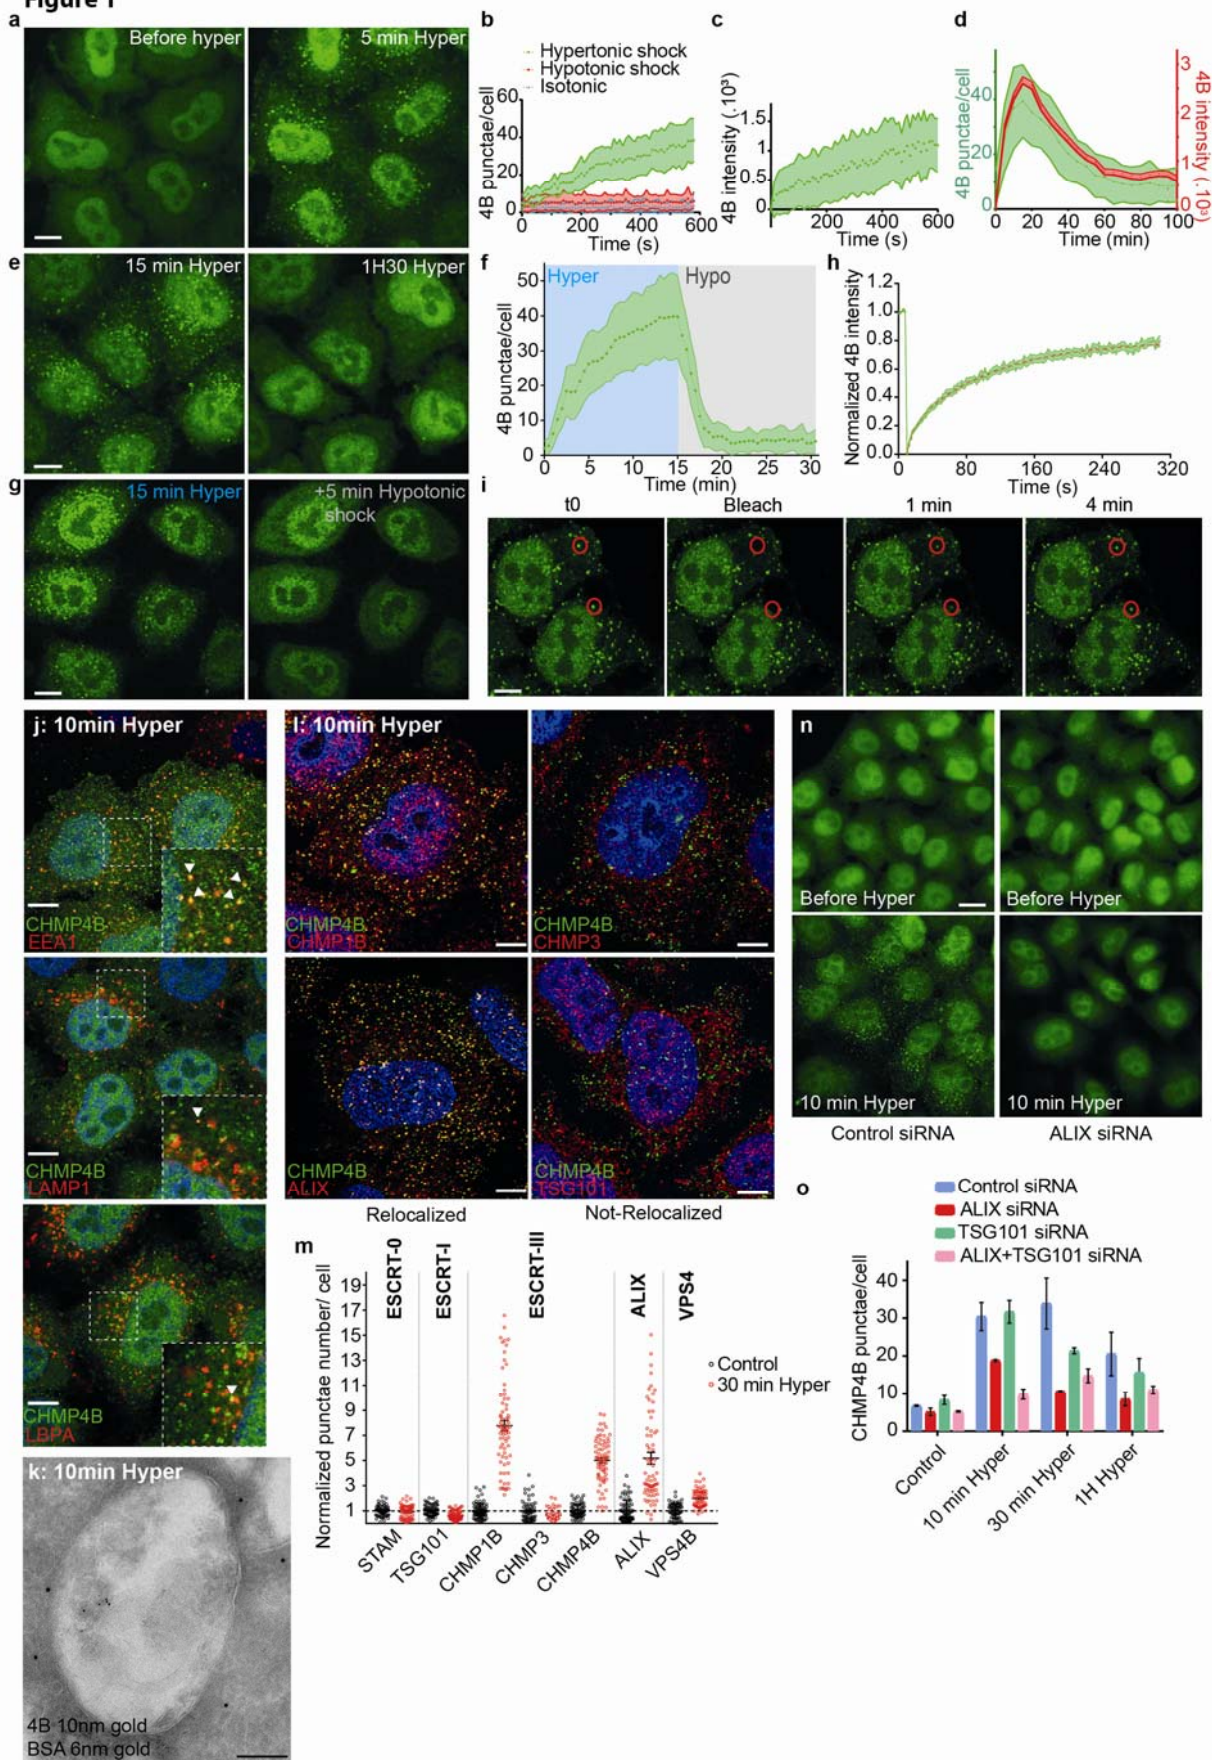

95 **Figure 1: Hypertonic shock triggers fast and transient CHMP4B recruitment on endosomes.**

96 a) Confocal projections of HeLa cells stably expressing CHMP4B-GFP before and after a 5min incubation with a  
97 hypertonic solution (800 mOsm). Bar: 10  $\mu$ m. b) Average number of CHMP4B punctae per cell with time after  
98 hypertonic (~800 mOsm), isotonic (~330 mOsm) or hypotonic (~250 mOsm) shocks. Shaded areas: mean  $\pm$  SEM  
99 (N=27-31 cells from 3 independent replicates). c) Mean intensity of CHMP4B-GFP punctae over time. Shaded  
100 areas: mean  $\pm$  SD (N=821 punctae from 19 cells from 3 independent replicates). d) Mean intensity of CHMP4B  
101 punctae (Red curve, red shaded area: SEM) and average number of CHMP4B punctae per cell (green curve, green  
102 shaded area: SD) over 100 min. (N=27 cells, 3 independent replicates). e) Confocal projections of CHMP4B-GFP  
103 HeLa cells for later time points (15 and 90 min) after hypertonic shock. Bar: 10  $\mu$ m. f) Average number of  
104 CHMP4B-GFP punctae per cell during a 15min hypertonic shock (~800 mOsm, Blue) followed by 15min of  
105 hypotonic shock (~250 mOsm, grey). Shaded area: SD (N=47 cells from 3 independent replicates). g)  
106 Representative confocal projections of one experiment quantified in (f). Bar: 10  $\mu$ m. h) Mean fluorescence recovery  
107 curve after photobleaching of CHMP4B-GFP punctae, fitted with a double exponential (dotted line). Shaded area:  
108 SEM (N=33 punctae from 3 independent replicates). i) Representative confocal images of one experiment quantified  
109 in (h). Bar: 5  $\mu$ m. j) Confocal images of immunofluorescences showing colocalization (arrows) of several  
110 endosomal markers with CHMP4B-GFP after 10min hypertonic shock. Bar: 5  $\mu$ m. k) BSA-gold (6nm) was  
111 endocytosed for 15min followed by a 10min hypertonic shock. Cells were processed for immuno-electron  
112 microscopy using anti CHMP4B antibody followed by 10nm ProteinA-gold. Bar: 100 nm. l) Confocal images of  
113 immunofluorescences showing colocalization between CHMP4B-GFP and indicated ESCRT subunits after 10min  
114 hypertonic shock. Bar: 4  $\mu$ m. m) Quantification of punctae number per cell from automated confocal images of  
115 immunofluorescence before (black) and after 30min hypertonic shock (red) for various markers. Bars are  
116 mean $\pm$ SEM. One dot corresponds to the average number of punctae per cell in one field of view (70 fields in 3  
117 independent experiments, few tens of cells per field) normalized to the average number before shock (black). n)  
118 Confocal images of CHMP4B-GFP HeLa cells before and after 10min hypertonic shock, pre-treated with anti-ALIX  
119 siRNAs or control siRNAs against VSV-G. Bar: 15  $\mu$ m. o) Mean number of CHMP4B punctae per cell, for cells  
120 treated with control siRNAs or siRNAs against ALIX, TSG101 or both, before and after hypertonic shocks of  
121 various duration. (N>2000 cells, from 3 independent replicates).

122

123 Next, we investigated whether hypertonic conditions would also reduce the endosome volume  
124 and in turn membrane tension (Fig S1a). In order to measure the volume of individual  
125 endosomes, cells were transfected with the constitutively active RAB5 mutant RAB5Q79L, to  
126 generate enlarged early endosomes amenable to software-based segmentation. Upon hypertonic  
127 shock, CHMP4B was rapidly recruited onto defined regions of these large endosomes (Fig 2a-b),  
128 corresponding to ESCRT domains<sup>11,12</sup>. Strikingly, hypertonic conditions decreased the volume  
129 of RAB5Q79L endosomes by more than 50% (Fig 2b-c). Note that the volume change occurs  
130 with faster kinetics than the accumulation of CHMP4B (Fig 2a-b), which reflects both the

131 nucleation and polymerization processes. The endosomal volume also decreased by almost 40%  
132 after hypertonic shock in non-transfected MDA-MB-231 cells, which have intrinsically large  
133 endosomes (Fig 2d). Changes in endosomal volumes are highly unlikely to result from some  
134 alterations in the endocytic membrane flux, since hypertonic conditions are known to stop  
135 endocytic membrane transport<sup>13,14</sup>.

136

137 We then investigated whether the decrease in endosomal volume observed after hypertonic shock  
138 was correlated with a decrease in membrane tension. To this end, we used a modified version of  
139 FliptR (Fluorescent lipid tension Reporter, also called Flipper-TR), a probe that reports changes  
140 in membrane tension by changes in fluorescence lifetime<sup>8</sup>, called Lyso Flipper which selectively  
141 targets acidic compartments<sup>15</sup>. After hypertonic shock, the fluorescence lifetime of Lyso Flipper  
142 decreased, showing that hypertonicity reduced membrane tension of endosomes (HeLa MZ cells:  
143 Fig 2e-f; MDA-MD-231 cells: Fig S5a). This decrease in membrane tension was also observed  
144 in cells expressing RAB5Q79L incubated for 2h at 37°C with FliptR in order to label endosomes  
145 (Lyso Flipper did not stain well mildly acidic RAB5Q79L endosomes). Indeed, after hypertonic  
146 shock, the lifetime of FliptR decreased (Fig 2g-h), and this decrease correlated well with the  
147 observed decrease in endosomal volume (Fig 2a-c). These observations suggest that  
148 hypertonicity reduced membrane tension of endosomes by deflating them, which in turn may  
149 trigger ESCRT-III recruitment. Alternatively, hypertonic conditions may also trigger ESCRT-III  
150 recruitment by increasing the cytosolic concentration of its subunits. We thus investigated  
151 conditions in which membrane tension could be decreased without changing cytosolic  
152 concentrations.

153 We reasoned that tension may also decrease upon membrane damage. To this end, we used the  
154 small peptide LLOMe (L-Leucyl-L-Leucine methyl ester), which causes transient  
155 permeabilization of late endosomes and lysosomes<sup>16</sup> as illustrated by the rapid neutralization of  
156 the endo-lysosomal pH followed by a slower recovery, almost complete after 2h (Fig 2i-j, Fig  
157 S6a,c,f-g, Movie S3). Treatment with LLOMe caused fast recruitment of CHMP4B-GFP (Fig2i,  
158 k-l, Fig S6b-d,f, Movie S3, S4) onto late endocytic compartments — much like hypertonic  
159 conditions (compare Fig 1f with Fig 2k). The effects of LLOMe were transient and followed by  
160 re-acidification (Fig2i and Fig S6c), in good agreement with reports<sup>7,17</sup> that ESCRT-III-  
161 mediated lysosome repair precedes lysophagy and promotes cell survival<sup>17</sup>.

162 As observed under hypertonic conditions, CHMP1B, ALIX and VPS4B are recruited onto  
163 endosomal membranes by LLOMe. However, other subunits of ESCRT-0, ESCRT-I or ESCRT-  
164 III (CHMP3) were also recruited to varying extents by LLOMe (Fig 2m-n vs Fig 1l and Fig S2c,  
165 S3). Much like after hypertonic shock, Lyso Flipper lifetime decreased after LLOMe treatment,  
166 indicating that endosomal membrane tension decreased (Fig 2o, Fig S5c). By contrast, the  
167 membrane tension of RAB5Q79L early endosomes was not affected by LLOMe (Fig 2p, Fig  
168 S5b), consistent with the fact that LLOMe selectively targets late and acidic endosomal  
169 compartments<sup>16</sup>.

170 Depletion of TSG101 by RNAi prevented both membrane recruitment of CHMP4B (Fig 2q, Fig  
171 S4, Fig S6f) and re-acidification (Fig 2j, Fig S6e) in LLOMe-treated cells, confirming that  
172 ESCRT-III membrane recruitment is required to repair membrane damage. Altogether, these data  
173 indicate that ESCRT-III is recruited onto late endocytic compartments after membrane damage,  
174 presumably because membrane tension was relaxed. However, it is also possible that the  
175 membrane pores generated by LLOMe directly recruit ESCRT-III rather than decreased tension.  
176 We thus searched for a direct approach to show that a decrease in membrane tension promotes  
177 assembly of ESCRT-III molecules to the membrane.

178

179

180

181

182

**Figure 2**

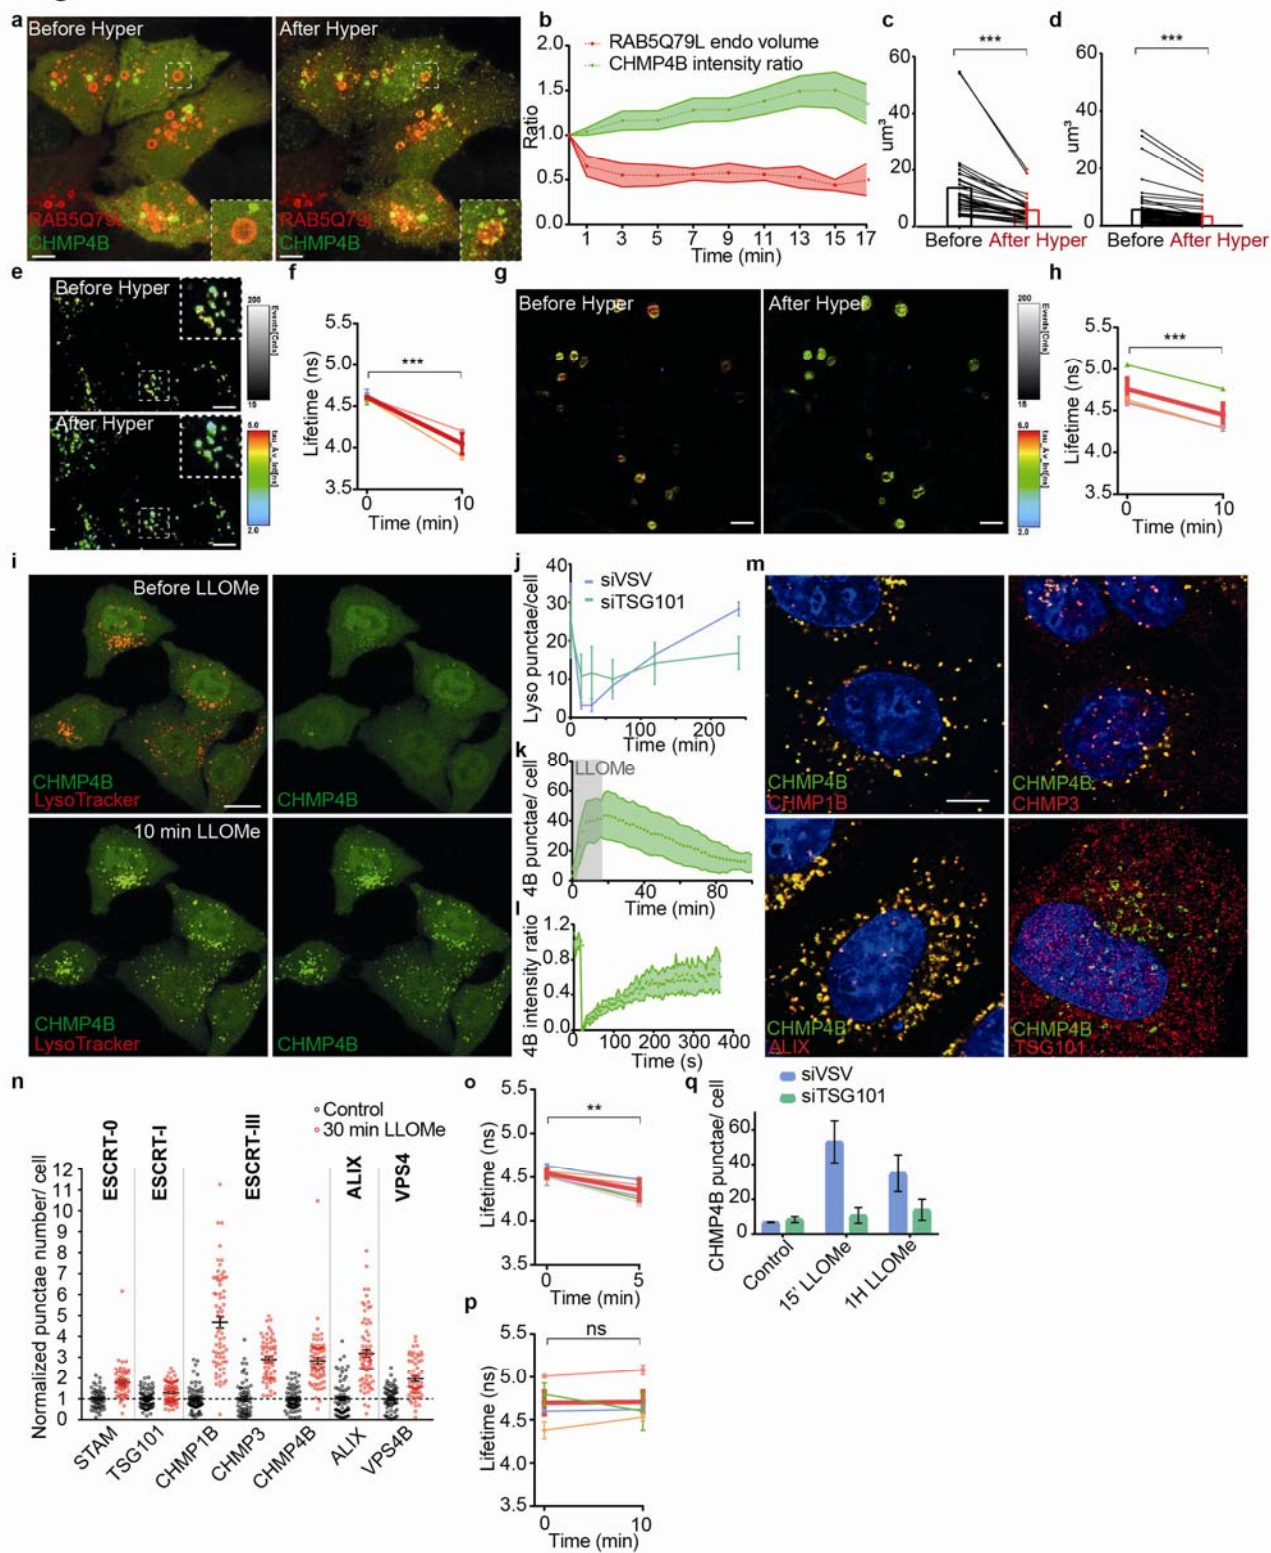



184 **Figure 2: Hypertonic shock and LLOMe decrease membrane tension of endosomes.**

185 a) Confocal images of HeLa-CHMP4B-GFP cells expressing mCherry-Rab5Q79L before and after a 20min  
186 hypertonic shock. Bar: 5  $\mu\text{m}$ . b) Average volume of Rab5Q79L endosomes (red curve, shaded area is SD) and  
187 average intensity of CHMP4B-GFP (green curve, shaded area is SD) after hypertonic shock (time 0), and  
188 normalized to initial value. (N=12 RAB5Q79L endosomes). c) Volumes of single RAB5Q79L endosomes before  
189 (black) and after a 10min hypertonic shock (red) (N=30 endosomes from 3 independent replicates, two-tailed  
190 Wilcoxon test:  $P=0.0000000019$ ). d) Volumes of single MDA-MB-231 endosomes labeled with FM4-64 before  
191 (black) and after (red) a 10min hypertonic shock. (N=52 endosomes from 3 independent replicates, two-tailed  
192 Wilcoxon test:  $P<10^{-15}$ ). e) FLIM images of HeLa endosomes labelled with Lyso Flipper before and after 10min  
193 hypertonic shock. Bar: 10  $\mu\text{m}$ . f) Lyso Flipper lifetime measurements from (e) before and after hypertonic shock.  
194 Thin coloured lines: 5 independent experiments; thick red line: mean with SEM (two-tailed paired t-test:  
195  $P=0.00000884003$ ). g) FLIM images of FliptR-labelled mCherry-RAB5Q79L endosomes in live HeLa MZ cells  
196 before and after a 10min hypertonic shock. Bar: 5  $\mu\text{m}$ . h) FliptR lifetime measurements from 3 independent  
197 experiments as shown in (g). Thin coloured lines: single experiments; thick red line: mean $\pm$ SEM of the 4  
198 experiments (two-tailed paired t-test:  $P=0.0003338778$ ). i) Confocal images of live HeLa-CHMP4B-GFP cells  
199 labelled with LysoTracker before and after a 10min incubation with 0.5mM LLOMe. Bar: 10  $\mu\text{m}$ .j) Average number  
200 of LysoTracker punctae per cell (>1000 cells in 3 independent replicates), and for cells treated with control siRNAs  
201 (VSV, blue) or siRNAs against TSG101 (green). Error bars: SEM. k) Average number of CHMP4B-GFP punctae  
202 per cell with time, during and after LLOMe treatment. Shaded area: SEM (N=33 cells from 3 independent  
203 replicates). l) Recovery after photobleaching of individual CHMP4B-GFP punctae induced by LLOMe treatment.  
204 Shaded area: SEM. (N=14 endosomes from 3 independent replicates). m) Confocal images of immuno-fluorescence  
205 against several markers after 10min incubation with LLOMe treatment. Bar: 4  $\mu\text{m}$ . n) Number of punctae per cell  
206 for different ESCRT subunits before (black) and after LLOMe treatment (red). Each dot represents the mean number  
207 of ESCRT punctae/cell in one field of view (70 fields in 3 independent experiments, few tens of cells per field)  
208 (mean  $\pm$  SEM). o) Lyso Flipper lifetime measurements before and 5min after LLOMe addition (quantification as in  
209 f). Thin coloured lines: 6 independent experiments; thick red line: mean with SEM (two-tailed paired t-test:  
210  $P=0.00454651$ ). p) FliptR lifetime measurements of RAB5Q79L endosomes before and 10min after LLOMe  
211 treatment (lifetime was measured as in f). Thin coloured lines: independent experiments; thick red line: mean with  
212 SEM (two-tailed paired t-test:  $P=0.89443$ ). q) Average number of CHMP4B-GFP punctae per cell before (control)  
213 and after treatment with LLOMe in cells transfected with control siRNAs (siVSV) or siRNAs against TSG101. Error  
214 bars are SEM (N>1000 cells, from 3 independent replicates). In f, h, o and p, for each experiment, average  
215 fluorescent lifetimes were calculated from >500 endosomes taken from at least 3 different cells.

216

217 To this end, we used a simplified system that by-passes the need for some regulatory factors and  
218 is amenable to direct bio-physical manipulations and measurements, consisting of purified,  
219 recombinant human CHMP4B labelled with Alexa 488 and giant unilamellar vesicles (GUVs),

220 as model membranes. The GUV lipid composition was dioleoyl-phosphatidylcholine  
221 (DOPC):dioleoyl-phosphatidylserine (DOPS) [60:40 Mol%], negatively charged lipid DOPS  
222 being required for CHMP4B association to the bilayer<sup>18</sup>. Upon incubation with 1 $\mu$ M CHMP4B  
223 under isotonic conditions (250mOsm), CHMP4B was detected on the bilayer after 30min,  
224 consistent with the relatively slow kinetics of nucleation and filament growth<sup>18</sup> (Fig 3a-c).  
225 Replacement of isotonic with hypertonic solution (500mOsm) caused a three-fold increase in the  
226 binding rate of CHMP4B to the GUV (Fig 3a-e, Movie S5) — binding rates can be extracted  
227 from exponential fits (Fig 3e). By contrast, almost no CHMP4B binding was observed under  
228 hypotonic conditions (Fig 3f). Moreover, following the hypertonic treatment, a hypotonic  
229 solution significantly reduced CHMP4B binding (Fig 3c, and see kymograph in Fig 3b), further  
230 demonstrating the role of osmotic pressure in the recruitment process. Similar results were  
231 obtained with Snf7, the yeast CHMP4 homologue (Fig S7h-i). These data show that  
232 hyperosmotic conditions stimulate CHMP4B binding to artificial membranes *in vitro*, much like  
233 on endosomes *in vivo*.

234 To change membrane tension without changing osmolarity, we controlled tension by aspirating  
235 GUVs with micropipettes and monitored CHMP4B membrane binding rates (see outline in Fig  
236 S7a), while an isotonic solution containing CHMP4B was injected. Then, the aspiration pressure  
237 was decreased (Fig S7a), as evidenced by the disappearance of the membrane tongue in the  
238 pipette (Fig S7f). The decrease in membrane tension nicely correlated with an almost two-fold  
239 increase in CHMP4B binding rate (Fig.S7g). Finally, the dependence of CHMP4B binding rate  
240 on tension was quantified directly. Membrane tension was measured by pulling membrane tubes  
241 from GUVs<sup>18</sup> using optical tweezers<sup>19</sup> (Fig 3g). CHMP4B binding rate inversely correlated with  
242 membrane tension. An exponential-fit revealed that above a threshold tension of  $\sim 0.1$  mN.m<sup>-1</sup>,  
243 CHMP4B binding rate was severely reduced (Fig 3h). Interestingly, this threshold value is  
244 similar to Chmp4B/Snf7 polymerization energy<sup>18</sup>, suggesting that tension could directly  
245 compete with CHMP4B polymerization<sup>20</sup>.

246 To visualize CHMP4B oligomers onto the membrane under varying osmotic conditions, large  
247 unilamellar vesicles (LUVs) were incubated with 1 $\mu$ M CHMP4B, negatively stained and  
248 analysed by electron microscopy. Under hypertonic conditions, CHMP4B formed spirals (Fig 3i;  
249 Fig S8d), resembling the spirals formed by Snf7 *in vitro*<sup>18</sup>, and observed with CHMP4B *in vivo*  
250<sup>21</sup> (Fig 3i; Fig S8d). Such spirals were rarely observed under isotonic conditions and almost never

251 under hypotonic conditions (Fig 3i; Fig S8c). These data further confirmed that CHMP4B  
252 membrane polymerization is facilitated by a decrease in membrane tension. We hypothesized  
253 that membrane deformation coupled to ESCRT-III polymerization is energetically more  
254 favourable when membrane tension is low <sup>18</sup>. In this case, one would expect CHMP4B  
255 polymerization to cause membrane deformation.

256

257

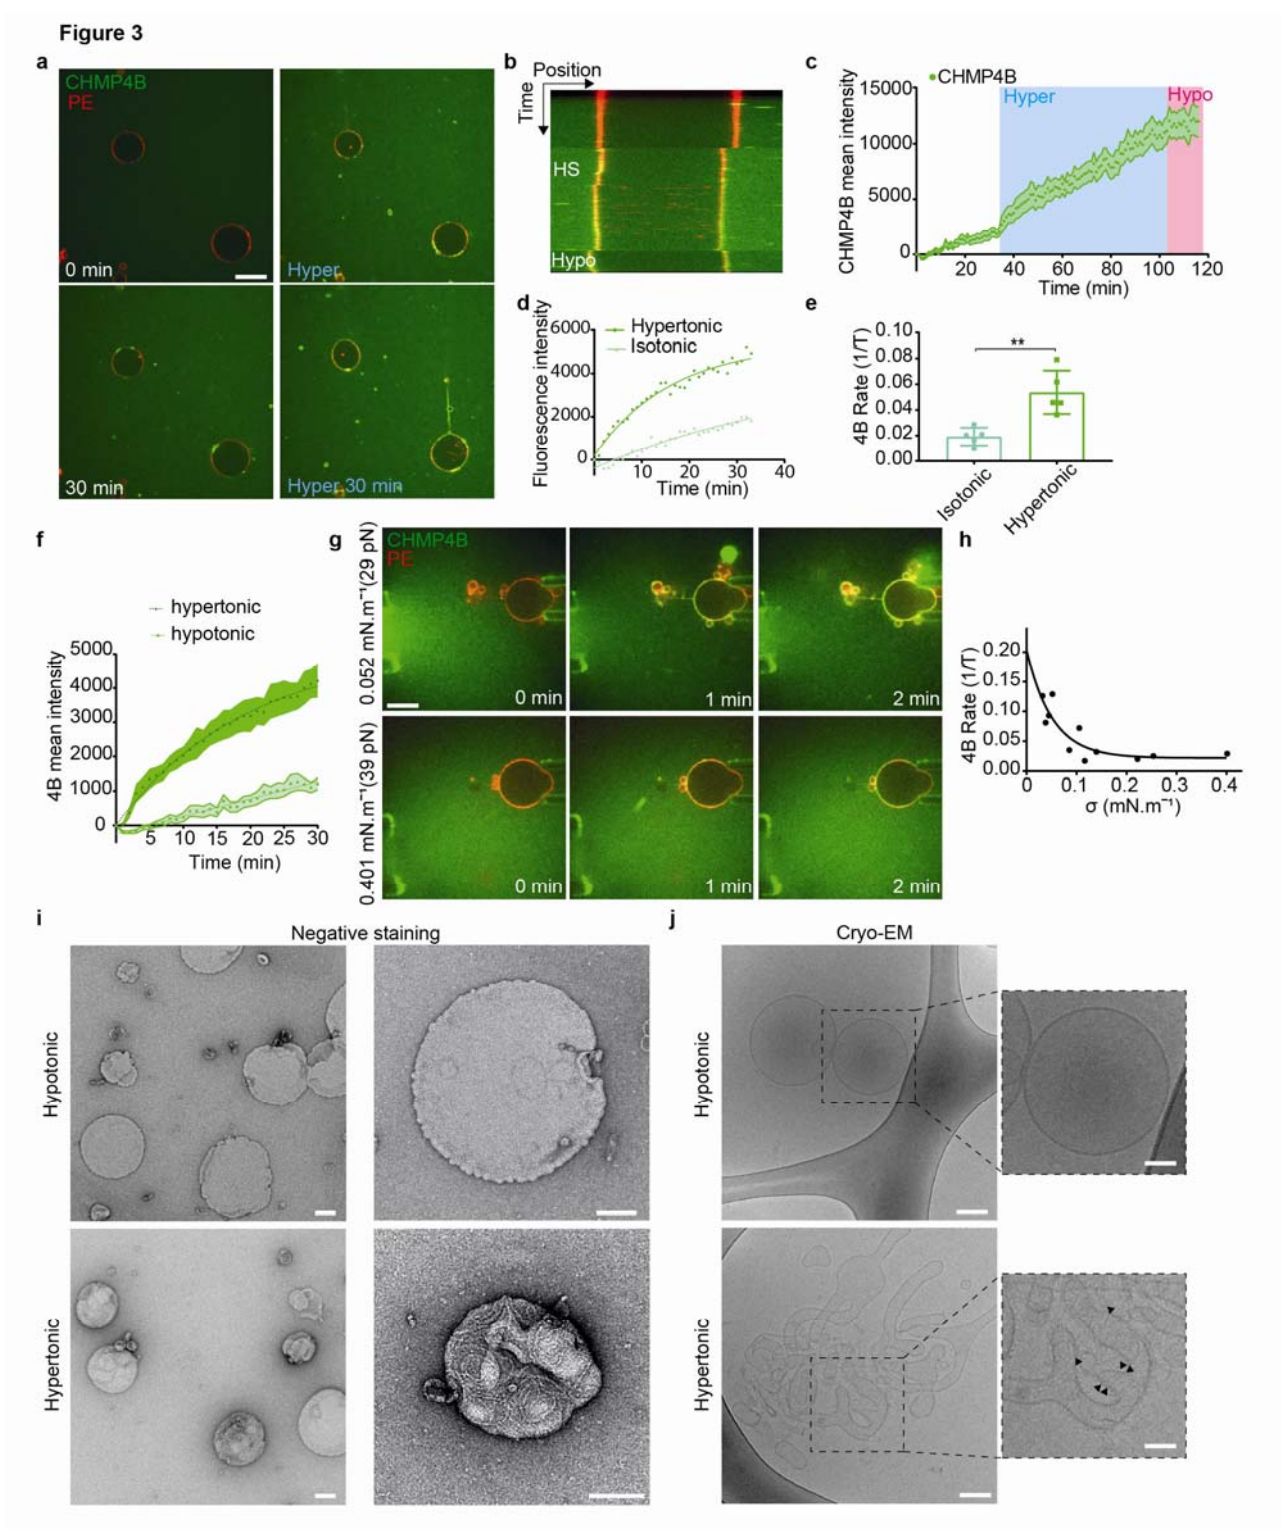

258  
259  
260  
261

262 **Figure 3: A decrease in membrane tension increases CHMP4B polymerisation rate in vitro**  
263 a) Time-lapse confocal images rhodamine-PE labelled GUVs (red) were mixed (0min) with 1  $\mu$ M CHMP4B-  
264 Alexa488 (green), and incubated first in isotonic (250mOsm, 0-30min, white captions) and then in hypertonic (500  
265 mOsm, 0-30min, blue captions) solutions. Bar: 20  $\mu$ m. b-d) Following experiment shown in (a), GUVs were  
266 switched to a hypotonic solution (200 mOsm) for 10min. b) shows a kymograph, c) mean intensity of CHMP4B on  
267 the bilayer over time; shaded area: SEM (N=13 GUVs), and d) CHMP4B-Alexa488 mean intensity with time on the  
268 GUV during isotonic and hypertonic phases. e) Binding rates extracted from single exponential fits to data as shown  
269 in d) (N=6). Each point represents a single experiment, for which 3-13 GUVs were analysed. (two-tailed paired t-  
270 test: P=0.0021). f) CHMP4B-Alexa488 mean intensity on GUVs under hypotonic (N=10 GUVs) and hypertonic  
271 conditions (N=8 GUVs). Binding rates are: hypotonic,  $1/\tau=0.0053 (\pm 0.009150) \text{ s}^{-1}$ ; hypertonic,  $1/\tau=0.05067$   
272  $(\pm 0.004313) \text{ s}^{-1}$ . g) The membrane tension of Rhod-PE GUVs (red) was adjusted using a micropipette, and measured  
273 by pulling a membrane tube with optical tweezers, while an isotonic solution containing CHMP4B (green) was  
274 injected (see diagram in Fig S6a). Time-lapse confocal images show CHMP4B membrane association at low (upper  
275 panel), and high membrane tension (lower panel). H) CHMP4B binding rates ( $1/\tau$ ) plotted against membrane  
276 tension, as obtained from several experiments (one per dot) as in g). A single exponential decay (black curve) was  
277 fitted ( $R^2=0.76$ ). I) Negative stain electron micrographs of LUVs incubated with 1 $\mu$ M CHMP4B for 2h in a  
278 hypotonic (upper panels) or hypertonic solution (lower panels) at low (left panels) and high (right panels)  
279 magnification (Bars: 100 nm). j) Cryo-electron micrographs of LUVs in hypotonic and hypertonic conditions:  
280 CHMP4B filaments can be observed under hypertonic conditions (black arrowheads). Bars: left panels, 50 nm; right  
281 panels: 25 nm.

282

283 To test this possibility, CHMP4B-decorated LUVs were analysed by cryo-electron microscopy.  
284 In these samples, regularly spaced filaments were clearly visible on the bilayer after incubation  
285 under hypertonic conditions, but almost never observed under hypotonic conditions (Fig 3j).  
286 Importantly, tubular and vesicular deformations, covered with CHMP4B filaments could be  
287 observed in hypertonic solutions, while essentially absent under hypotonic conditions (Fig 3j, Fig  
288 S8a-b). Furthermore, LUVs that were not decorated by filaments – even in hypertonic conditions  
289 – were not deformed (Fig 3j, Fig S6a-b). This strongly support the view that a decrease in  
290 membrane tension facilitates membrane deformation by ESCRT-III polymerization.

291 Given the role of ESCRT-III in ILV formation, we wondered if a decrease of endosomal  
292 membrane tension could trigger ILV formation. First, we analysed the ultrastructure of  
293 endosomes after hypertonic shock by Correlative Light-Focused Ion Beam-Scanning Electron  
294 Microscopy (FIB-CLEM). CHMP4B-labeled endosomes (Fig 4a) appeared more electron-dense  
295 after hypertonic shock when compared to untreated controls. Moreover, the density of

296 endosomes containing BSA-gold endocytosed for 15min (early endosomes) was increased after  
297 hypertonic shock when compared to controls (Fig S9a). Late endosomes containing endocytosed  
298 BSA gold chased for 2h were more electron-dense than early endosomes even without treatment,  
299 and yet the treatment also increased their density (Fig S9a). While this increase may be due to  
300 volume reduction (Fig 2a-d), we reasoned that it may also result from an increased number of  
301 ILVs formed upon hypertonic shock.

302 In FIB-SEM samples, the number of ILVs indeed increased by almost 40% in early endosomes  
303 after hypertonic shock (Fig 4b,c), supporting the view that ESCRT-III recruitment under  
304 hypertonic conditions triggers ILV formation. Furthermore, CHMP4B co-clustered with EGF on  
305 endosomes (Fig 4d) – presumably ILV buds – as seen by STED. To test whether ILVs formed  
306 upon hypertonic shock, we monitored EGF receptor sorting into enlarged RAB5Q79L  
307 endosomes, which provide sufficient space resolution<sup>12,22</sup>. Cells were incubated with fluorescent  
308 EGF for 10min, and then EGF fluorescence intensity on the limiting membrane of enlarged  
309 endosomes was measured before and after hypertonic shock. Upon shock, the fluorescence  
310 intensity of CHMP4B increased (Fig 4e,g), as expected (Fig 2a), concomitant with an increase of  
311 the EGF signal in the endosomal lumen (Fig 4e). This increase presumably reflects EGFR  
312 sorting into ILVs, although it may also reflect an increased concentration due to the decreased  
313 endosome volume (Fig 2b-d). We thus monitored the decrease in EGF signal on the limiting  
314 membrane (Fig 4f), since this can only be accounted by ILV formation — membrane traffic  
315 being inhibited under hypertonic conditions. Altogether, these observations show that a decrease  
316 in membrane tension causes the recruitment of CHMP4B on endosomal membranes, which in  
317 turn drives the formation of intraluminal vesicles containing the EGF receptor.

318 These results suggested that membrane tension regulation may be at play during physiological  
319 trafficking of the EGF receptor. Indeed, EGF induces massive endocytosis of EGF receptor and  
320 stimulates ESCRT-dependent ILV formation in endosomes<sup>23</sup>. Therefore, we measured  
321 membrane tension of endosomes using Lyso Flipper after EGF treatment. Interestingly, 20min  
322 after 200ng/ml EGF addition, the endosomal volume increased almost two fold (Fig 4h), as  
323 previously shown<sup>24</sup>. More importantly, endosomal membrane tension was significantly reduced  
324 (Fig 4i, Fig S9b) showing that it is negatively regulated upon EGF-dependent ILV formation  
325 under physiological conditions. We propose that the fusion of endocytic vesicles containing the

326 EGF receptor with endosomes increases the endosome membrane surface area, which in turn  
327 decreases membrane tension and promotes ILV formation by the ESCRT machinery (Fig 4j).

**Figure 4**

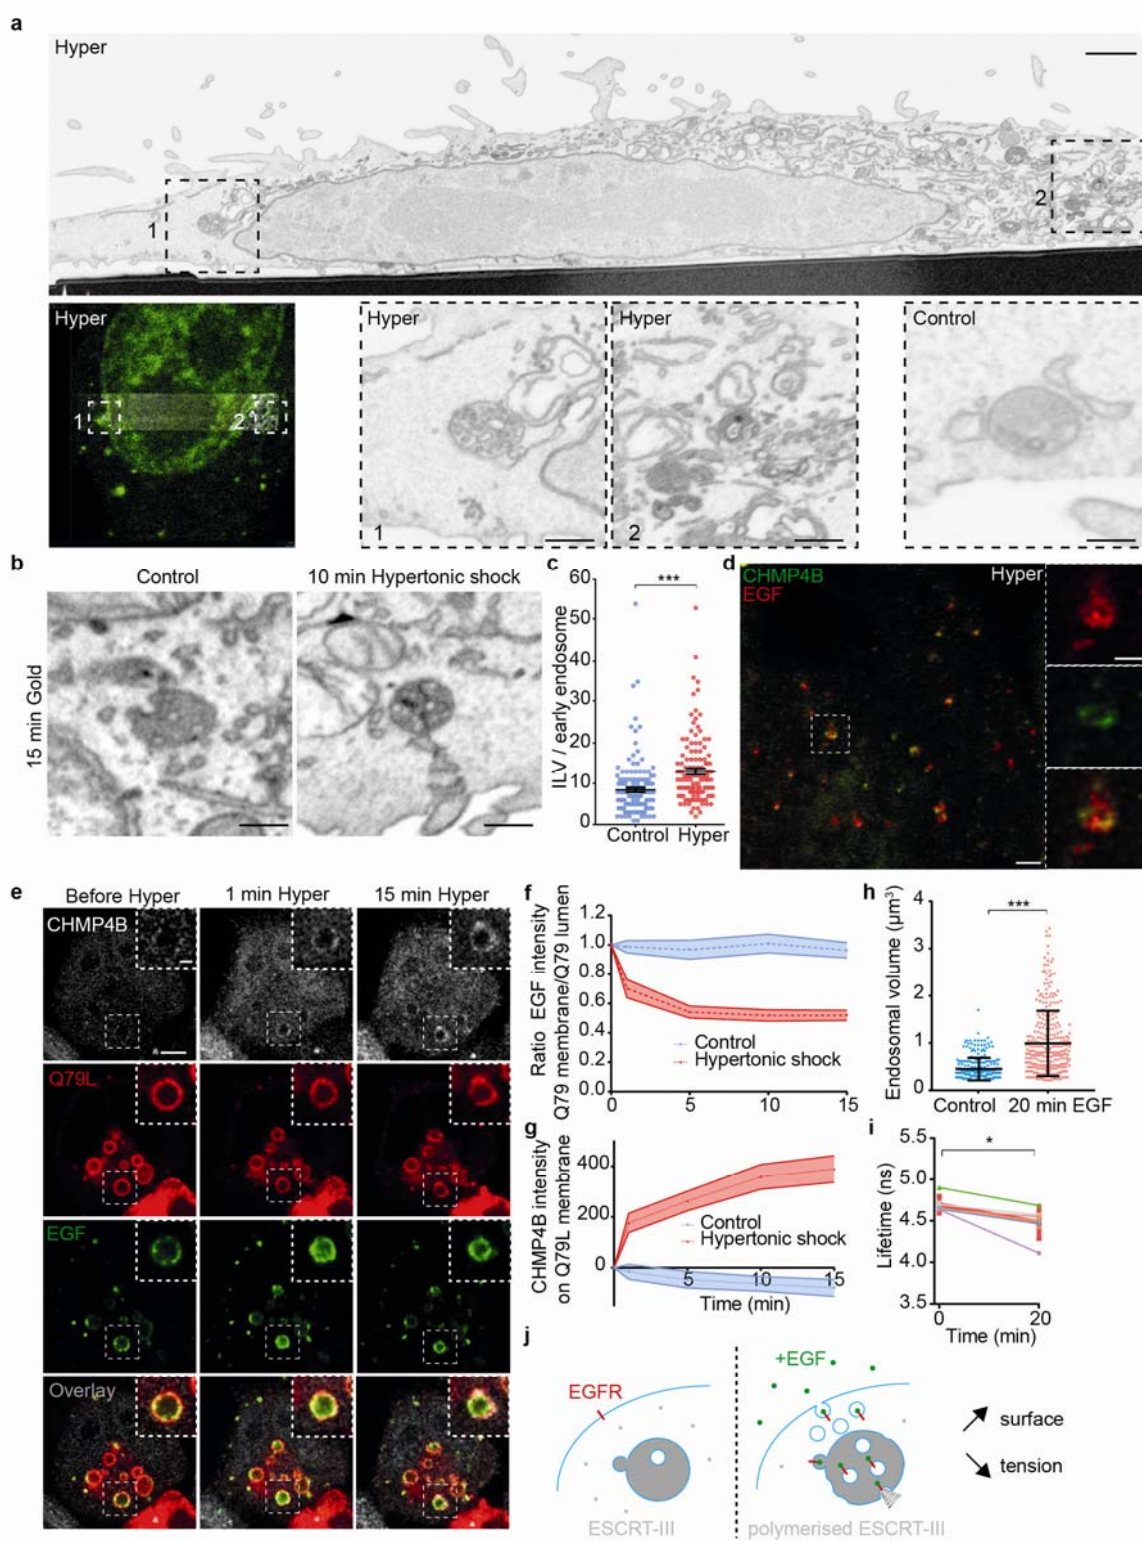



329 **Figure 4: Tension-induced CHMP4B recruitment on endosomes triggers ILV formation**  
330 a) CLEM-FIB-SEM micrographs of cells expressing CHMP4B-GFP treated with hypertonic medium (800 mOsm)  
331 for 10min. A whole cell section (upper panel, bar: 5  $\mu$ m) shows CHMP4B-GFP decorated endosomes (left panel) in  
332 boxed areas 1 and 2 (high magnification in lower panels, bar 1  $\mu$ m). Lower control panel shows a typical endosome  
333 under isotonic condition (bar: 200 nm). b-c) From FIB-SEM micrographs (b) of cells loaded with BSA-gold, ILV  
334 number per BSA-gold labelled early endosomes (EE) was quantified before (blue) and after (red) a 10min  
335 hypertonic shock Bars: 200 nm (c). Error bar is SEM (Control: 152, Hyper: 131 endosomes in 3 independent  
336 replicates, two-tailed Mann-Whitney test:  $P=0.0000000002$ ). d) STED microscopy images of cells expressing  
337 CHMP4B-GFP (green), incubated 10 minutes with far red EGF (red) and then subjected to 10min hypertonic shock.  
338 Bar: 2  $\mu$ m High magnification (right panels) bars: 500 nm. e) Time-lapse confocal images of HeLa-CHMP4B-GFP  
339 cells overexpressing RAB5Q79L-mcherry incubated 10 minutes with EGF-Alexa647, and subjected to hypertonic  
340 shock. f) Ratio of EGF fluorescence colocalizing with RAB5Q79L membrane over total EGF signal, normalized by  
341 the initial value. g) Intensity of CHMP4B-GFP on Rab5Q79L membrane. For g) and f), shaded areas are SEM  
342 (N=21 endosomes from 3 independent replicates (hypertonic shock) and N=16 endosomes from 3 independent  
343 replicates (control condition, isotonic). h) Volumes of endosomes stained with Lyso Flipper before and 20min after  
344 200 ng/ml EGF treatment. Dots correspond to single endosomes. Black line: Mean $\pm$ SD (N=266 endosomes (before)  
345 and N=308 (Hyper) from 3 independent replicates. Two-tailed Mann-Whitney:  $P<10^{-15}$ ). i) Lyso Flipper lifetime  
346 measurements before and 20min after 200 ng/ml EGF treatment. Thin lines: 5 independent replicates (a few  
347 hundreds of endosomes from more than 3 cells each); thick red line: mean $\pm$ SEM, two-tailed paired t-test  
348  $P=0.025138$ . j) Schematic of a putative mechanism for membrane tension dependent ILV formation by ESCRT-III  
349 machinery (see text).

350 In conclusion, our in vitro data unambiguously demonstrate that CHMP4B can polymerize on the  
351 membrane only when membrane tension is lowered. The precise role of lipid organization and  
352 packing in CHMP4B membrane association remains unclear. However, it is tempting to  
353 speculate that decreased tension, which influences lipid packing and lateral mobility<sup>25</sup>, directly  
354 facilitates membrane interactions with CHMP4B. Clearly, it can be expected that in vivo such  
355 interactions are stabilized by the coincident detection of multiple binding partners<sup>26</sup> and protein-  
356 protein interactions. Indeed, we find that both ALIX and TSG101, which interact physically with  
357 each other<sup>27</sup>, act as ESCRT-III nucleator in vivo. Our data indicate that CHMP4B recruitment  
358 under hypertonic conditions and LLOMe treatment exhibit some preference for ALIX and  
359 TSG101, respectively, perhaps reflecting subtle changes in membrane organization — hence in  
360 the capacity to interact with ALIX or TSG101 — after either treatment.

361 As CHMP4B uses membranes as a substrate to polymerize, a lower tension likely facilitates  
362 ESCRT polymerisation in its preferred curvature radius. Conversely, high tension may inhibit

363 CHMP4B binding as the polymerisation energy will not be sufficient to allow membrane  
364 deformation. It is tempting to speculate that this mechanism is shared by all ESCRT-III mediated  
365 reactions, and that membrane tension drives all ESCRT-III dependent processes.

366

## 367 **ACKNOWLEDGEMENTS**

368 The authors want to thank ACCESS, the Bioimaging platforms, bioimaging core facility and the  
369 electron microscopy core facility of University of Geneva for constant support. JG acknowledges  
370 support from the Swiss National Science Foundation Grant No 31003A\_159479, the NCCR in  
371 Chemical Biology and LipidX from the Swiss SystemsX.ch Initiative. AR acknowledges funding  
372 from Human Frontier Science Program Young Investigator Grant RGY0076/2009-C, the Swiss  
373 National Fund for Research Grants N°31003A\_130520, N°31003A\_149975 and  
374 N°31003A\_173087, and the European Research Council Consolidator Grant N° 311536.

375

## 376 **DATA AVAILABILITY**

377 The data that support the findings of this study are available from the corresponding authors  
378 upon reasonable request.

379

## 380 **AUTHOR CONTRIBUTIONS**

381 VM, JG and AR designed the project based on the first observation made by GM. VM carried  
382 out all experiments and analyses. JL performed some experiments with VM, in particular  
383 CHMP4B purification. AG and SM designed and synthesised the Lyso Flipper and FliptR  
384 molecules. VM, JG and AR wrote the paper, with corrections from all co-authors.

385

## 386 **References and Notes:**

- 387 1 Pontes, B., Monzo, P. & Gauthier, N. C. Membrane tension: A challenging but universal physical  
388 parameter in cell biology. *Seminars in Cell & Developmental Biology* **71**, 30-41,  
389 doi:<https://doi.org/10.1016/j.semcdb.2017.08.030> (2017).
- 390 2 Vietri, M. *et al.* Spastin and ESCRT-III coordinate mitotic spindle disassembly and nuclear  
391 envelope sealing. *Nature* **522**, 231-235, doi:10.1038/nature14408 (2015).
- 392 3 Olmos, Y., Hodgson, L., Mantell, J., Verkade, P. & Carlton, J. G. ESCRT-III controls nuclear  
393 envelope reformation. *Nature* **522**, 236-239, doi:10.1038/nature14503 (2015).
- 394 4 Denais, C. M. *et al.* Nuclear envelope rupture and repair during cancer cell migration. *Science*  
395 **352**, 353 (2016).

- 396 5 Raab, M. *et al.* ESCRT III repairs nuclear envelope ruptures during cell migration to limit DNA  
397 damage and cell death. *Science* **352**, 359 (2016).
- 398 6 Jimenez, A. J. *et al.* ESCRT machinery is required for plasma membrane repair. *Science* **343**,  
399 1247136, doi:10.1126/science.1247136 (2014).
- 400 7 Skowyra, M. L., Schlesinger, P. H., Naismith, T. V. & Hanson, P. I. Triggered recruitment of ESCRT  
401 machinery promotes endolysosomal repair. *Science* **360** (2018).
- 402 8 Colom, A. *et al.* A fluorescent membrane tension probe. *Nature Chemistry* **10**, 1118-1125,  
403 doi:10.1038/s41557-018-0127-3 (2018).
- 404 9 Mierzwa, B. E. *et al.* Dynamic subunit turnover in ESCRT-III assemblies is regulated by Vps4 to  
405 mediate membrane remodelling during cytokinesis. *Nat Cell Biol* **19**, 787-798,  
406 doi:10.1038/ncb3559 (2017).
- 407 10 Bissig, C. *et al.* Viral infection controlled by a calcium-dependent lipid-binding module in ALIX.  
408 *Dev Cell* **25**, 364-373, doi:10.1016/j.devcel.2013.04.003 (2013).
- 409 11 Raiborg, C. *et al.* Hrs sorts ubiquitinated proteins into clathrin-coated microdomains of early  
410 endosomes. *Nat Cell Biol* **4**, 394-398, doi:10.1038/ncb791 (2002).
- 411 12 Pons, V. *et al.* Hrs and SNX3 Functions in Sorting and Membrane Invagination within  
412 Multivesicular Bodies. *PLOS Biology* **6**, e214, doi:10.1371/journal.pbio.0060214 (2008).
- 413 13 Heuser, J. E. & Anderson, R. G. Hypertonic media inhibit receptor-mediated endocytosis by  
414 blocking clathrin-coated pit formation. *The Journal of cell biology* **108**, 389-400,  
415 doi:10.1083/jcb.108.2.389 (1989).
- 416 14 Nunes, P. *et al.* Ionic imbalance, in addition to molecular crowding, abates cytoskeletal dynamics  
417 and vesicle motility during hypertonic stress. *Proceedings of the National Academy of Sciences*  
418 **112**, E3104, doi:10.1073/pnas.1421290112 (2015).
- 419 15 Goujon, A. *et al.* Mechanosensitive Fluorescent Probes to Image Membrane Tension in  
420 Mitochondria, Endoplasmic Reticulum, and Lysosomes. *Journal of the American Chemical*  
421 *Society*, doi:10.1021/jacs.8b13189 (2019).
- 422 16 Repnik, U. *et al.* LLOMe does not release cysteine cathepsins to the cytosol but inactivates them  
423 in transiently permeabilized lysosomes. *Journal of Cell Science* (2017).
- 424 17 Radulovic, M. *et al.* ESCRT-mediated lysosome repair precedes lysophagy and promotes cell  
425 survival. *The EMBO Journal* **37**, doi:10.15252/embj.201899753 (2018).
- 426 18 Chiaruttini, N. *et al.* Relaxation of Loaded ESCRT-III Spiral Springs Drives Membrane  
427 Deformation. *Cell* **163**, 866-879, doi:10.1016/j.cell.2015.10.017 (2015).
- 428 19 Morlot, S. *et al.* Membrane shape at the edge of the dynamin helix sets location and duration of  
429 the fission reaction. *Cell* **151**, 619-629, doi:10.1016/j.cell.2012.09.017 (2012).
- 430 20 Lenz, M., Crow, D. J. & Joanny, J. F. Membrane buckling induced by curved filaments. *Phys Rev*  
431 *Lett* **103**, 038101, doi:10.1103/PhysRevLett.103.038101 (2009).
- 432 21 Hanson, P. I., Roth, R., Lin, Y. & Heuser, J. E. Plasma membrane deformation by circular arrays of  
433 ESCRT-III protein filaments. *J Cell Biol* **180**, 389-402, doi:10.1083/jcb.200707031 (2008).
- 434 22 Bache, K. G. *et al.* The ESCRT-III subunit hVps24 is required for degradation but not silencing of  
435 the epidermal growth factor receptor. *Mol Biol Cell* **17**, 2513-2523, doi:10.1091/mbc.E05-10-  
436 0915 (2006).
- 437 23 Wenzel, E. M. *et al.* Concerted ESCRT and clathrin recruitment waves define the timing and  
438 morphology of intraluminal vesicle formation. *Nature communications* **9**, 2932-2932,  
439 doi:10.1038/s41467-018-05345-8 (2018).
- 440 24 Razi, M. & Futter, C. E. Distinct roles for Tsg101 and Hrs in multivesicular body formation and  
441 inward vesiculation. *Mol Biol Cell* **17**, 3469-3483, doi:10.1091/mbc.E05-11-1054 (2006).
- 442 25 Barelli, H. & Antonny, B. Lipid unsaturation and organelle dynamics. *Current Opinion in Cell*  
443 *Biology* **41**, 25-32, doi:https://doi.org/10.1016/j.ceb.2016.03.012 (2016).

- 444 26 Carlton, J. G. & Cullen, P. J. Coincidence detection in phosphoinositide signaling. *Trends in cell*  
445 *biology* **15**, 540-547, doi:10.1016/j.tcb.2005.08.005 (2005).
- 446 27 von Schwedler, U. K. *et al.* The Protein Network of HIV Budding. *Cell* **114**, 701-713,  
447 doi:[http://dx.doi.org/10.1016/S0092-8674\(03\)00714-1](http://dx.doi.org/10.1016/S0092-8674(03)00714-1) (2003).

448

449
